# Supplementary material for: Tenofovir Disoproxil Fumarate versus Adefovir Dipivoxil for Chronic Hepatitis B
Source: Atypon-hosted journal article supplement (doi:10.1056/nejmoa0802878), 2008-12-03

## Supplementary Appendix

This appendix has been provided by the authors to give readers additional information about their work.

Supplement to: Marcellin P, Heathcote EJ, Buti M, et al. Tenofovir disoproxil fumarate versus adefovir dipivoxil for chronic hepatitis B. *N Engl J Med* 2008;359:2442-55.

## Study GS-US-174-0102: Consort Diagram

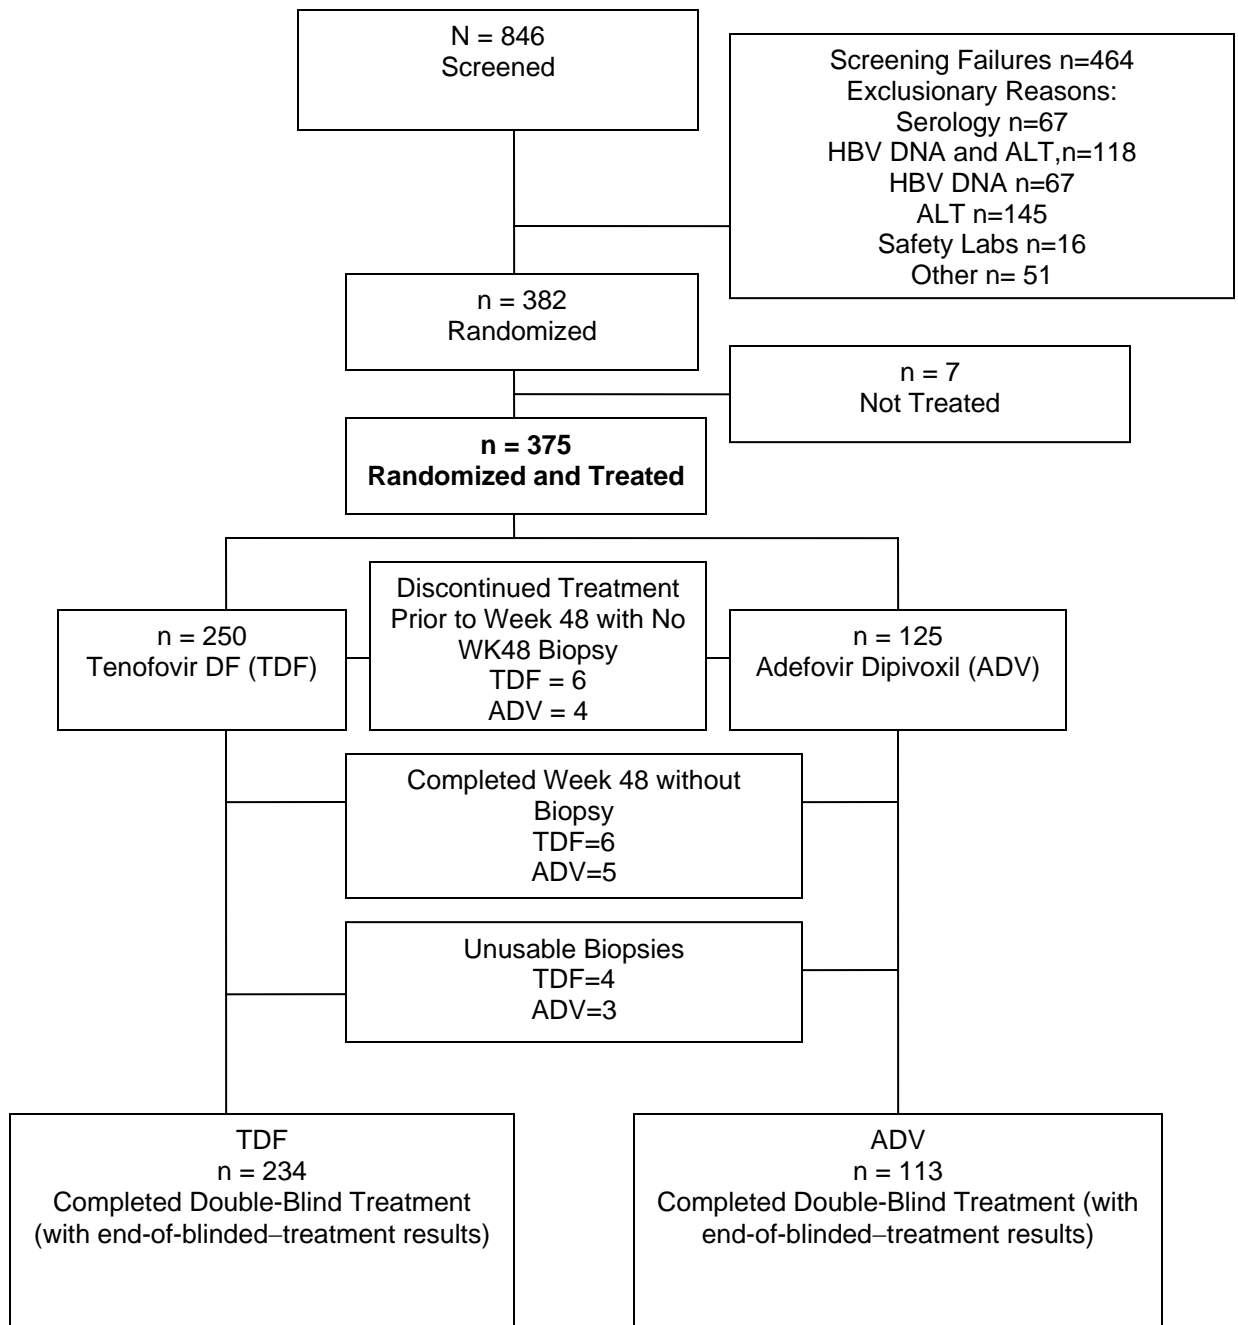

# Study GS-US-174-0103 Consort Diagram

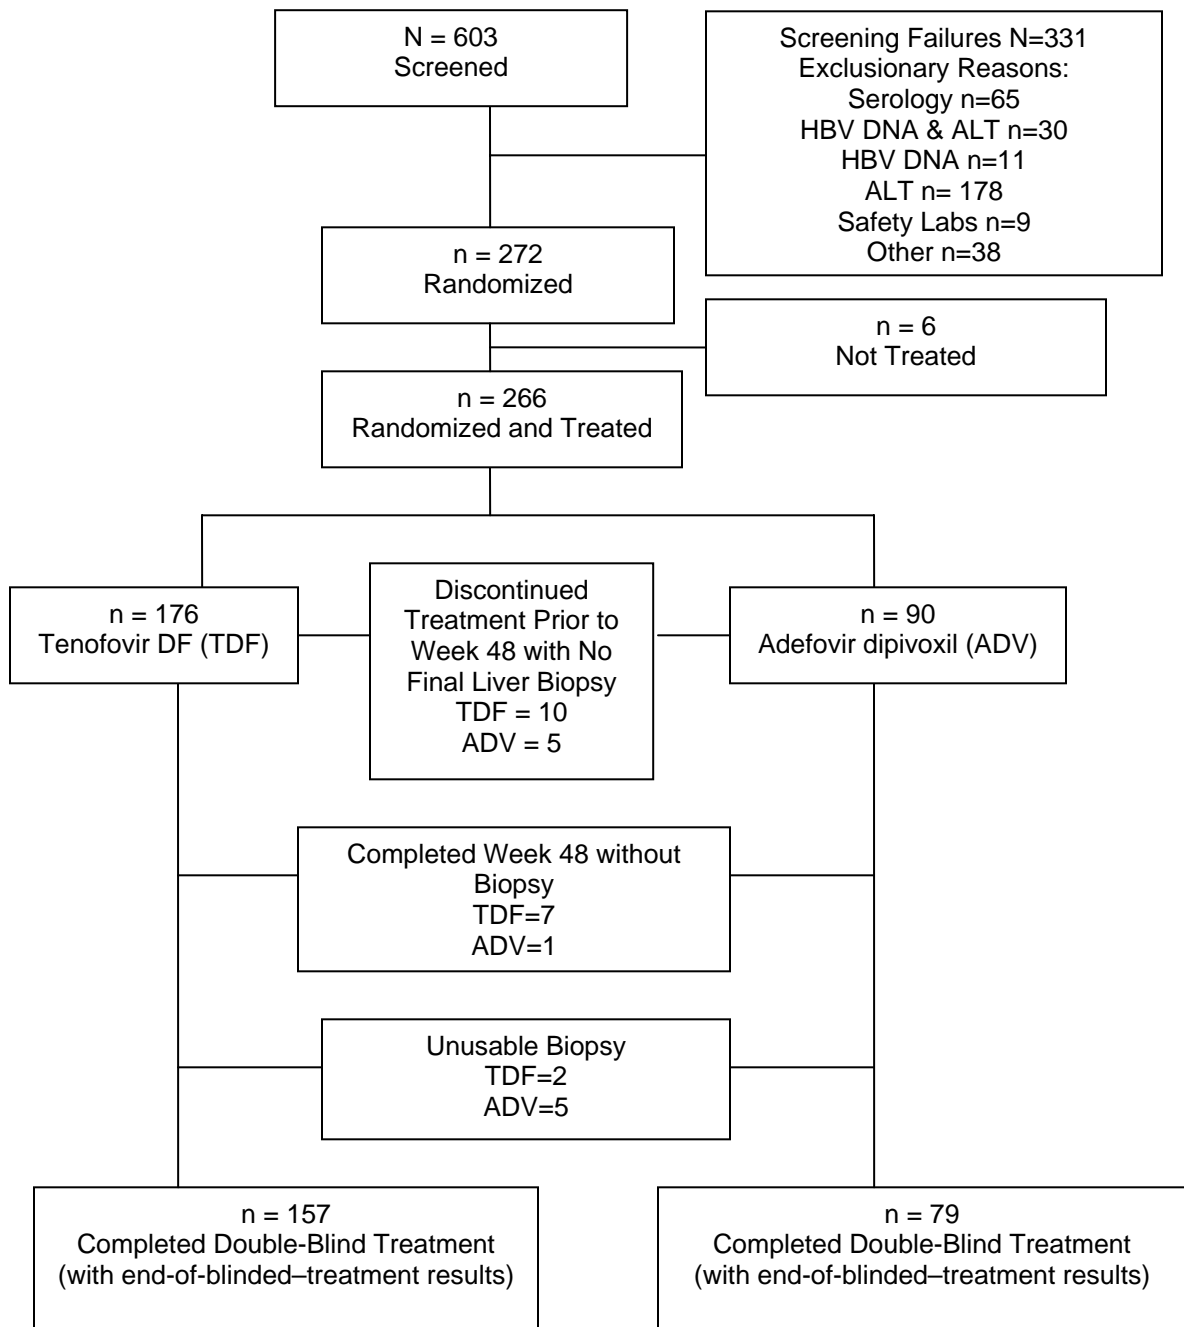

## Forest Plots of Treatment Difference (95% Confidence Interval) for Subgroups Primary Endpoint

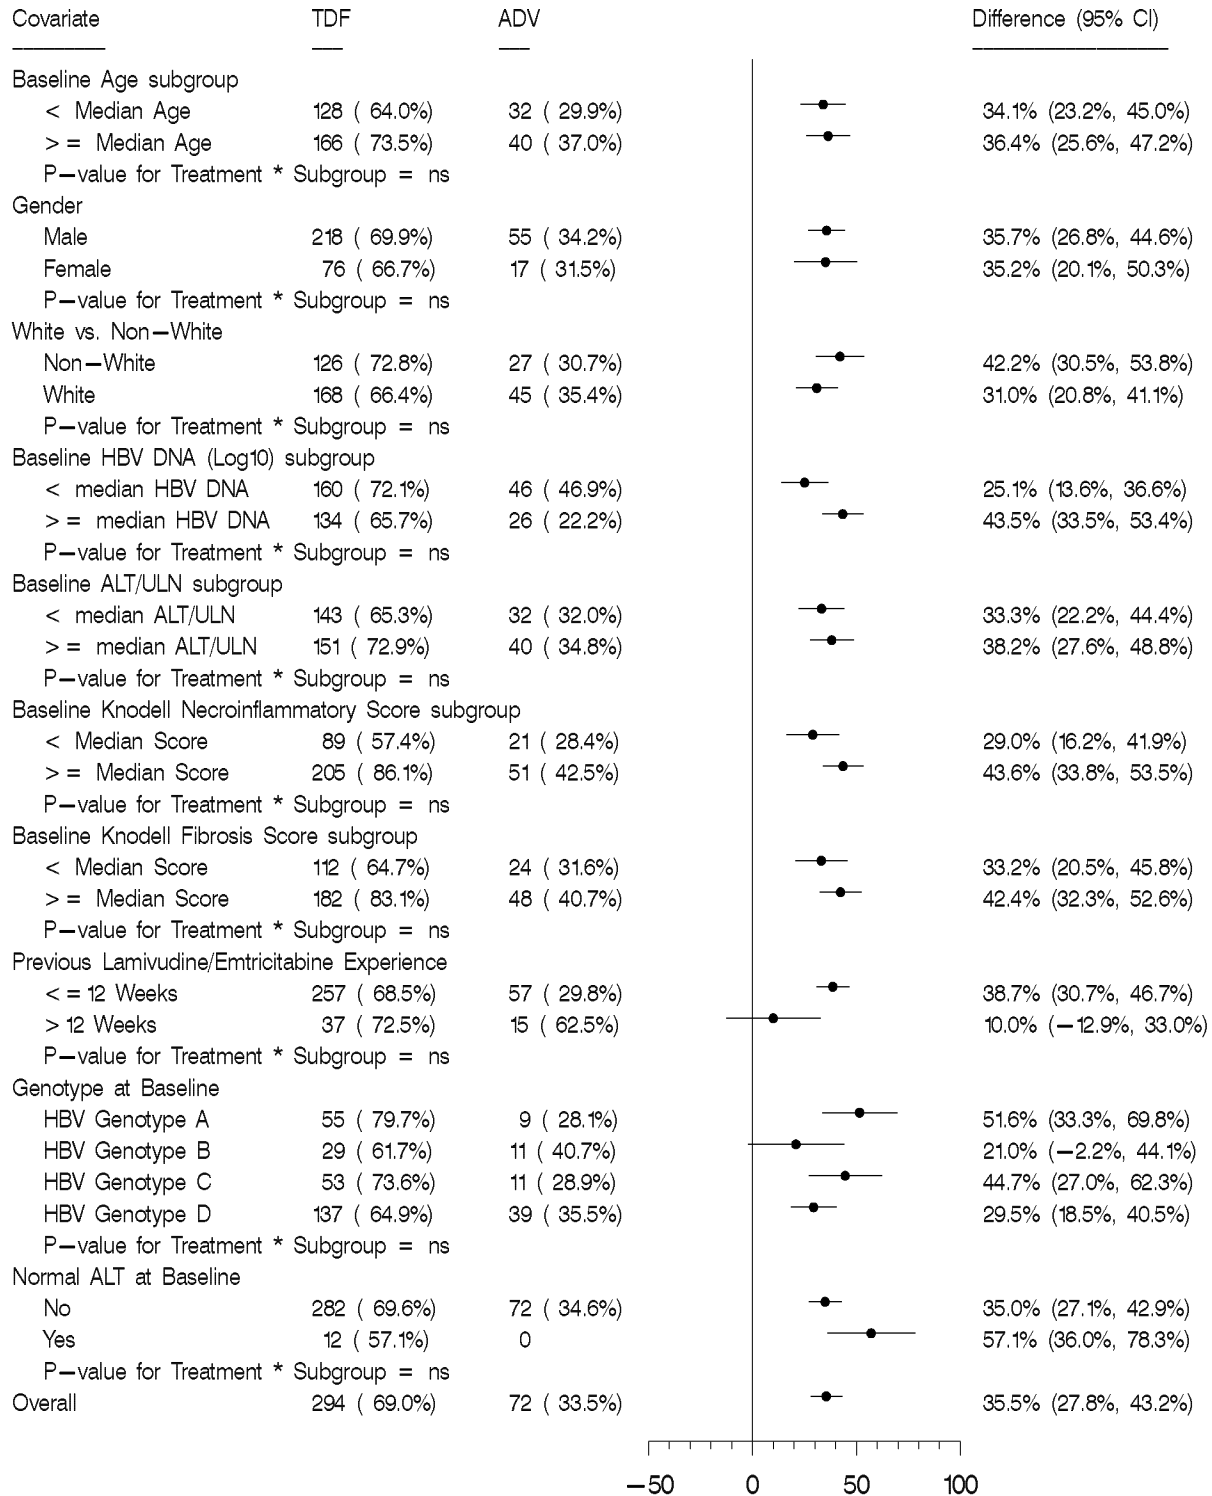

## Forest Plots of Treatment Difference (95% Confidence Interval) for Subgroups HBV DNA < 400 copies/mL

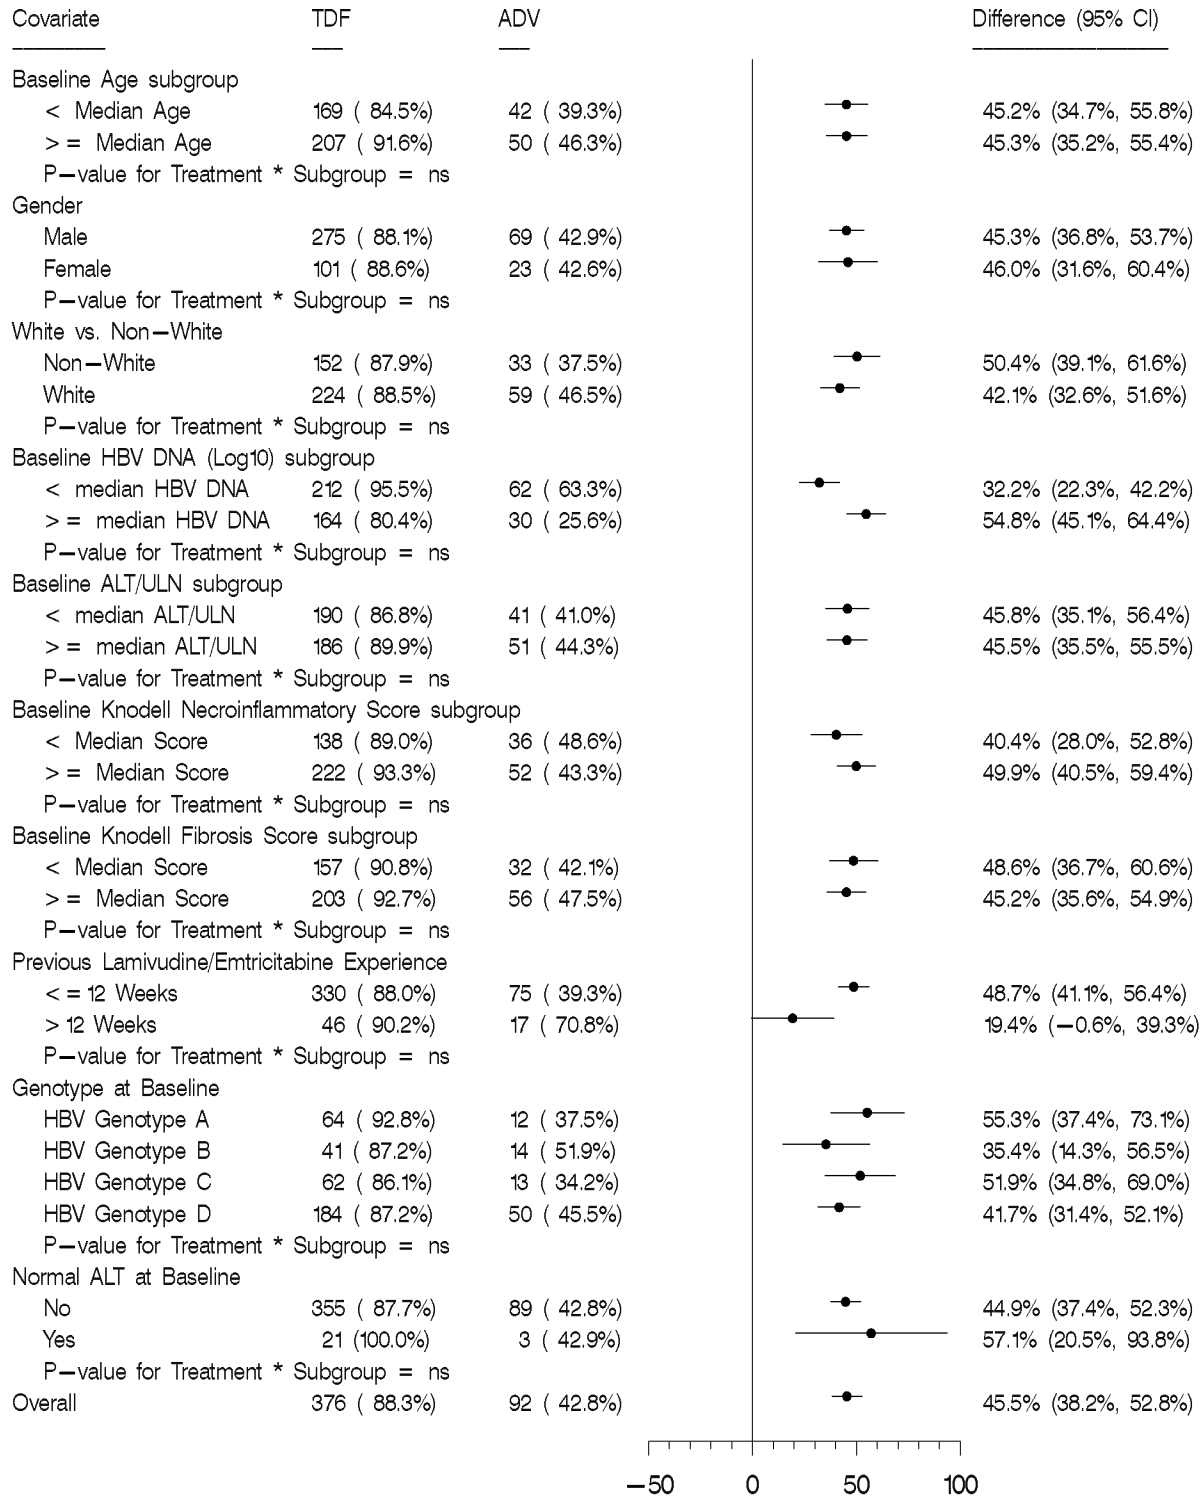

## Forest Plots of Treatment Difference (95% Confidence Interval) for Subgroups Histologic Response

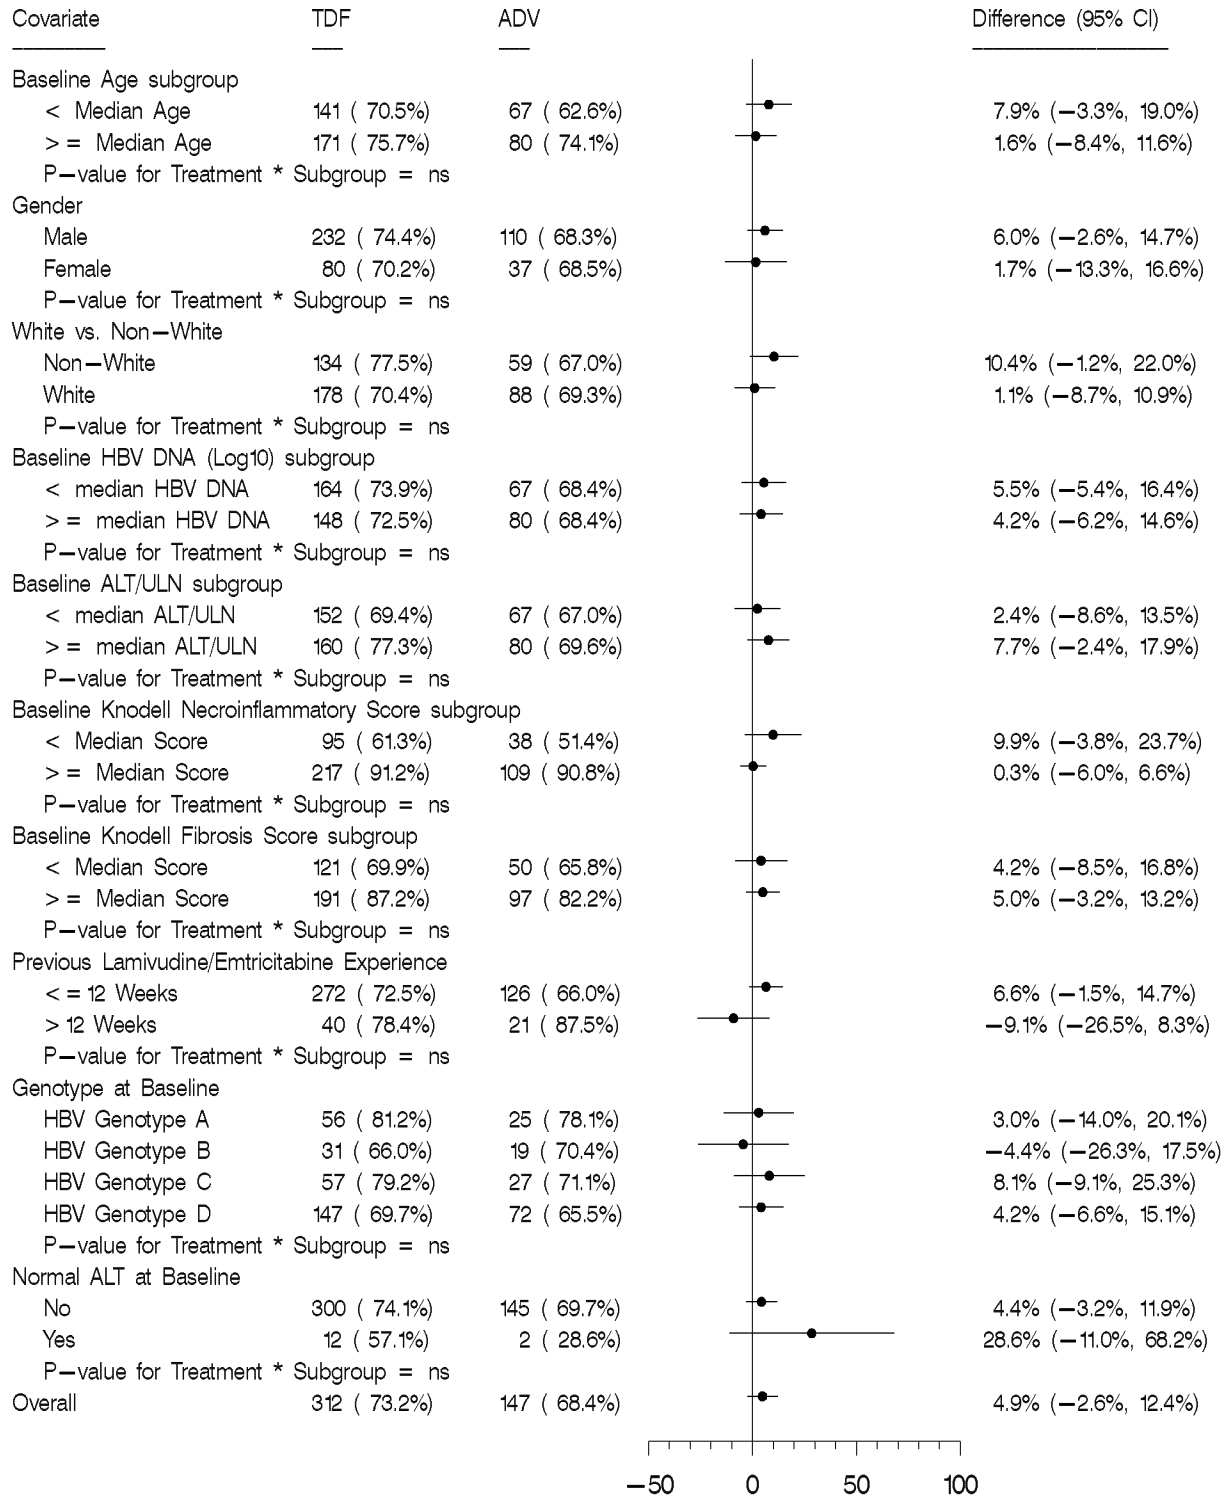

Supplement: nejm_marcellin_2442sa1.pdf [file nejm_marcellin_2442sa1.pdf]
